# Supplementary material for: Investigating essential gene function in Mycobacterium tuberculosis using an efficient CRISPR interference system
Source: PubMed Central journal article supplement — Nucleic Acids Res. 2016 Jul 12;44(18):e143. doi: 10.1093/nar/gkw625 (PMC5062980; doi:10.1093/nar/gkw625), 2016-07-12
Supplement: supp_gkw625_nar-01451-met-h-2016-File008.pdf [file supp_gkw625_nar-01451-met-h-2016-File008.pdf]

**Figure S1. Sequence of *dcas9* (*cas9* D10A and H840A) codon-optimized for *M. tuberculosis*.\***

ATGGACAAGAAGTACAGCATCGGCCTGGCGATCGGCACGAACTCGGTGGGCTGGGCGGTTCATCACGGACGAGTACAA  
GGTCCCCTCCAAGAAGTTCAAGGTCTGGGCAACACCGACCGGCACAGCATCAAGAAGAACCTGATCGGCGCCCTGC  
TGTTTCGACTCCGGCGAGACCGCCGAGGCGACGCGCTGAAGCGGACCGCGCGGCCGATAACACGCGGCGCAAGAAC  
CGCATCTGCTACCTGCAGGAAATCTTCTCGAACGAGATGGCCAAGGTGGACGACAGCTTCTTCCACCGGCTGGAGGA  
GTCCTTCTGGTGGAGGAGGACAAGAAGCACGAGCGCCACCCGATCTTCGGCAACATCGTGGACGAGGTGGCCTACC  
ACGAGAAGTACCCCACGATCTACCACCTGCGCAAGAAGCTGGTGGACAGCACCGACAAGGCGGACCTGCGGCTGATC  
TACCTGGCCCTGGCGCACATGATCAAGTTCGCGGCCACTTCTGATCGAGGGCGACCTGAACCCGGACAACCTCGGA  
CGTGGACAAGCTGTTTCATCCAGCTGGTGCAGACCTACAACCAGCTGTTTCGAGGAGAACCCCATCAACGCCTCCGGCG  
TGGACGCCAAGGCGACTCTGTTCGGCGCGCTGTCCAAGTTCGCGGCCCTGGAGAACCTGATCGCCAGCTGCCGGGC  
GAGAAGAAGAACCGCCTGTTTCGGCAACCTGATCGCGCTGAGCCTGGGCCTGACGCCCACTTCAAGTCCAACCTCGA  
CCTGGCCGAGGACGCGAAGCTGCAGCTGTCAAGGACACCTACGACGACGACCTGGACAACCTGAGTGGCCAGATCG  
GCGACCAGTACGCGGACCTGTTCTGGCCGCCAAGAACCTGAGCGACGCCATCCTGCTGTCCGACATCCTGCGGGTC  
AACACCGAGATCACGAAGGCCCGCTGAGCGCGTCCATGATCAAGCGGTACGACGAGCACCACCAGGACCTGACCCT  
GCTGAAGGCGCTGGTGCGCCAGCAGCTGCCCGAGAAGTACAAGGAAATCTTCTTCGACCAGTCAAGAACGGCTACG  
CCGGCTACATCGACGGCGGCGGAGCCAGGAGGAGTTCTACAAGTTCATCAAGCCGATCCTGGAGAAGATGGACGGC  
ACGGAGGAGCTGCTGGTCAAGCTGAACCGCGAGGACCTGCTGCGCAAGCAGCGGACCTTCGACAACGGCTCGATCCC  
GCACCAGATCCACCTGGGCGAGCTGCACGCCATCCTGCGGCGCCAGGAGGACTTCTACCCCTTCTGAAGGACAACC  
GCGAGAAGATCGAGAAGATCCTGACCTTCCGCATCCCGTACTACGTGGGCCCCCTGGCCCGCGGCAACTCGCGGTTT  
GCGTGGATGACCCGGAAGAGCGAGGAGACCATCACGCCGTGGAACCTTCGAGGAGGTCGTGGACAAGGGCGCCTCGGC  
GCAGAGCTTTCATCGAGCGCATGACCAACTTCGACAAGAACCTGCCGAACGAGAAGGTCTGCCAAGCACAGCCTGC  
TGTACGAGTACTTCACCGTGTACAACGAGCTGACGAAGGTCAAGTACGTGACCGAGGGCATGCGGAAGCCGGCCTTC  
CTGTTCGGGCGAGCAGAAGAAGGCGATCGTGGACCTGCTGTTCAAGACCAACCGCAAGGTACACGGTGAAGCAGCTGAA  
GGAGGACTACTTCAAGAAGATCGAGTGTTCGACTCGGTTCGAGATCAGCGGCGTGGAGGACCGCTTCAACGCCAGCC  
TGGGCACCTACCACGACCTGCTGAAGATCATCAAGGACAAGGACTTCTGGACAACGAGGAGAACGAGGACATCCTG  
GAGGACATCGTCTGACCCCTGACGCTGTTTCGAGGACCGCGAGATGATCGAGGAGCGGCTGAAGACGTACGCCCACCT  
GTTTCGACGACAAGGTGATGAAGCAGCTGAAGCGGCGCCGATACACCGGCTGGGGCCGCCTGTTCGCGGAAGCTGATCA  
ACGGCATCCGGGACAAGCAGTCCGGCAAGACCATCTGGACTTCTGAAGTCGGACGGCTGTCGCAACCGCAACTTC  
ATCGAGCTGATCCACGACGACGACCTGACCTTCAAGGAGGACATCCAGAAGGCCCAAGTTCGCGGCGCCAGGCGACTC  
CTGTCACGAGCACATCGCCAACCTGGCGGGCTCGCCGGCGATCAAGAAGGGCATCCTGCAGACCGTCAAGGTTCGTGG  
ACGAGCTGGTCAAGGTGATGGGCGGCCACAAGCCCGAGAACATCGTGTGATCGAGATGGCCCGGGAGAACCAGACCACG  
CAGAAGGGCCAGAAGAACAGCCGCGAGCGGATGAAGCGCATCGAGGAGGGCATCAAGGAGCTGGGCTCGCAGATCCT  
GAAGGAGCACCCGGTTCGAGAACACCCAGCTGCAGAACGAGAAGCTGTACCTGTACTACCTGCAGAACGGCCGCGACA  
TGTACGTGGACCAGGAGCTGGACATCAACCGGCTGAGCGACTACGACGTGGACGCCATCGTGCCGCAGTTCGTTCTCTG  
AAGGACGACAGCATCGACAACAAGGTCTGACCCGCTCGGACAAGAACCAGGGCAAGTCGGACAACGTGCCAGCGGA  
GGAGGTTCGTAAGAAGATGAAGAATACTGGCGCCAGCTGCTGAACGCCAAGCTGATCACGCAGCGCAAGTTCGACA  
ACCTGACCAAGGCCGAGCGGGGCGGCCTGAGCGAGCTGGACAAGGCGGGCTTTCATCAAGCGCCAGCTGGTTCGAGACC  
CGGCAGATCACGAAGCACGTGGCGCAGATCCTGGACTCGCGGATGAACACGAAGTACGACGAGAACGACAAGCTGAT  
CCGCGAGGTCAAGGTGATCACCTGAAGTCCAAGCTGGTCTCGGACTTCCGCAAGGACTTCCAGTTCATAAGGTCC  
GGGAGATCAACAACCTACCACCACGCCACGACGCGTACCTGAACGCCGTCTGGGACCCGCGCTGATCAAGAAGTAC  
CCGAAGCTGGAGTCGGAGTTCGTCTACGGCGACTACAAGGTCTACGACGTGCGCAAGATGATCGCCAAGAGCGAGCA  
GGAGATCGGCAAGGCCACCGCAAGTACTTCTTCTACTCCAACATCATGAACTTCTTCAAGACCGAGATCACGCTGG  
CCAACGGCGAGATCCGCAAGCGCCCGCTGATCGAGACCAACGGCGAGACGGGCGAGATCGTCTGGGACAAGGGCCGC  
GACTTTCGCGACCGTCCGGAAGGTGCTGAGCATGCCGCGAGGTCAACATCGTGAAGAAGACCGAGGTGCAGACGGGCGG  
CTTCTCCAAGGAGTCGATCCTGCCAAGCGCAACTCGGACAAGCTGATCGCCCGGAAGAAGGACTGGGACCCGAAGA  
AGTACGGCGGCTTCGACTCCCCACCGTGCCTACTCGGTGCTGGTTCGTCGGAAGGTTCGAGAAGGGCAAGTCCAAG  
AAGTGAAGTCGGTGAAGGAGCTGCTGGGACTCACCATCATGGAGCGCTCGTTCGTTTCGAGAAGAACCCGACTCGACTT  
CCTGGAGGCGAAGGGCTACAAGGAGGTCAAGAAGGACCTGATCATCAAGCTGCCAAGTACAGCCTGTTTCGAGCTGG  
AGAACGGCCGCAAGCGGATGCTGGCCTCCGCGGGCGAGCTGCAGAAGGGCAACGAGCTGGCCCTGCCGTCAAGTAC  
GTCAACTTCTGTACCTGGCGTCGCACTACGAGAAGCTGAAGGGCAGCCCCGAGGACAACGAGCAGAAGCAGCTGTT  
CGTGGAGCAGCACAAGCACTACCTGGACGAGATCATCGAGCAGATCAGCGAGTTCCTCAAGCGGGTTCATCCTGGCCG  
ACGCGAACCTGGACAAGGTGCTGTTCGGCCTACAACAAGCACCGCGACAAGCCGATCCGGGAGCAGGCGGAGAATC  
ATCCACCTGTTTACCCTGACGAACCTGGGCGCCCCCGCGCGTTCGAAGTACTTCGACACCACGATCGACCGCAAGCG  
GTACACCTCCACGAAGGAGGTGCTGGACGCGACCCTGATCCACCAGTCGATCACCGGCTGTACGAGACGCGCATCG  
ACCTGAGCCAGCTGGGCGGCGACTCCCGGGCGGACCCGAAGAAGAAGCGGAAGGTGTGA

\*Mutated codons 10 and 840 are shown in red and underlined.

**Figure S2. a) Integrating vector for expression *dcas9*; b) Replicating vector for sgRNA and *tetR* expression.** The integrating vector pRH2502 for induced expression of *dcas9* is derived from pTC-0X-1L (1), obtained from Addgene. The *PacI* site near the T4g32 sites was removed. *PacI* sites were introduced 15 bp after the *NdeI* site encompassing the start codon of *lacZl*, and 5' of the SV40 PA terminator. *lacZ* was removed and *dcas9* was inserted under the control of *uv15tetO* promoter at *NdeI* and *PacI* cloning sites. The replicative vector for sgRNA and TetR expression pRH2521 was derived from pTE-10M-0X (1) obtained from Addgene. The sequence *Pmyc1tetO* (2) followed by 2 *BbsI* sites and the sgRNA sequences were synthesized and cloned in pTE-10M-0X at a *Clal* site to produce pRH2521.

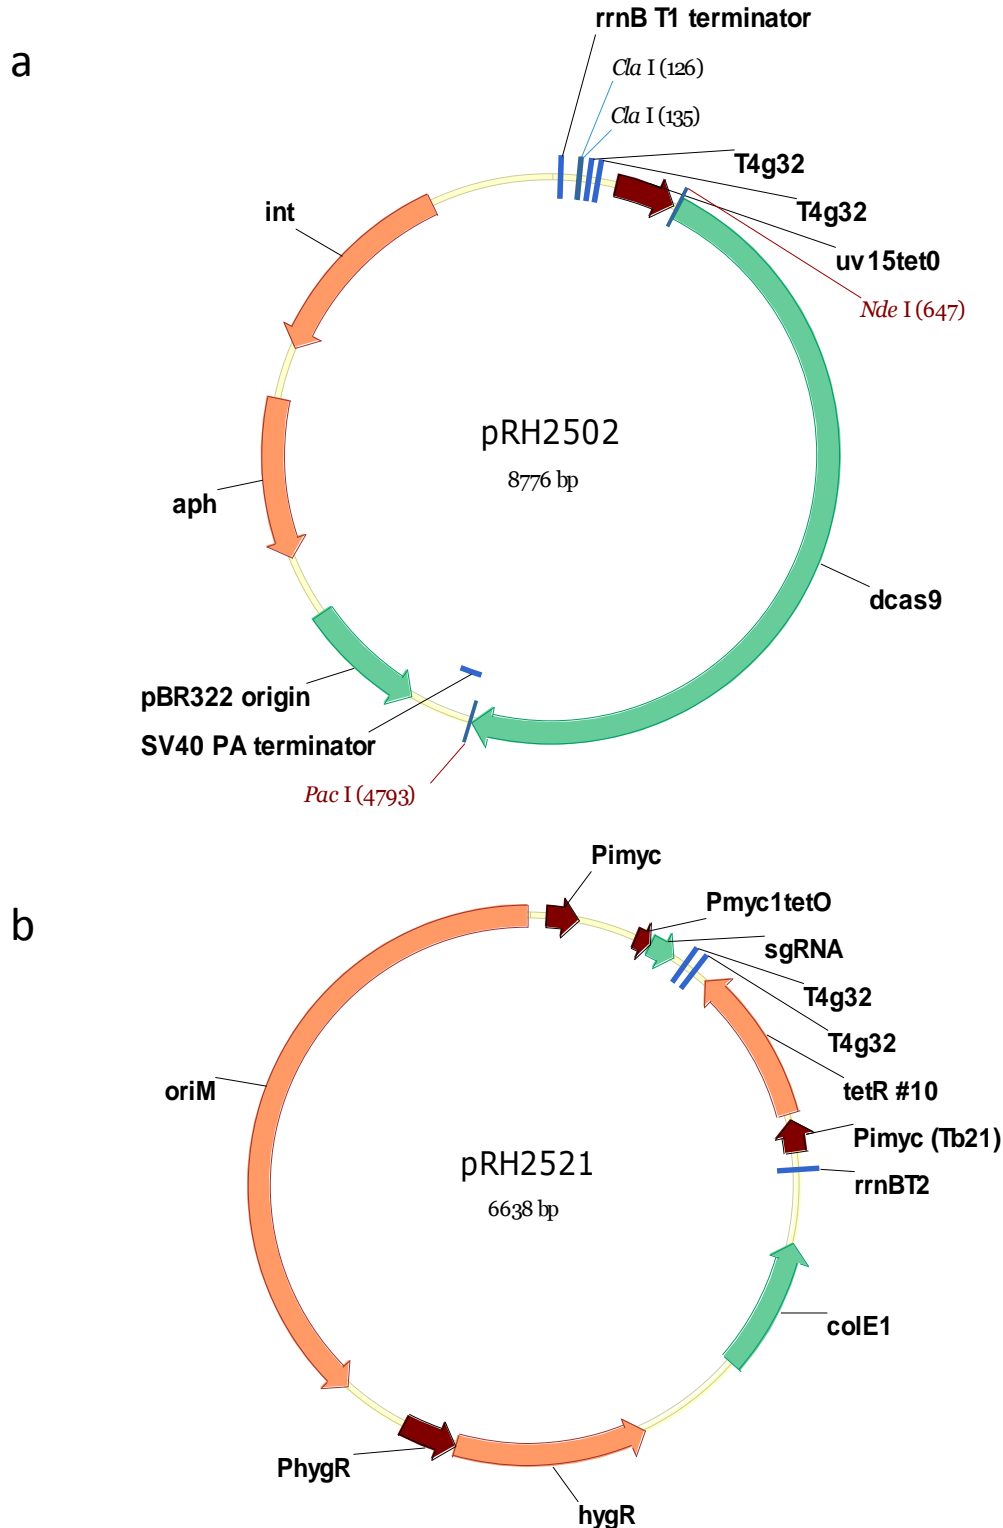

**Figure S3. Cloning strategy for construction of vectors to express sgRNAs to target genes of interest.** The example below incorporates sequences to target *M. smegmatis sigH*. The identical strategy is used to target genes in *M. tuberculosis* or *M. smegmatis*.

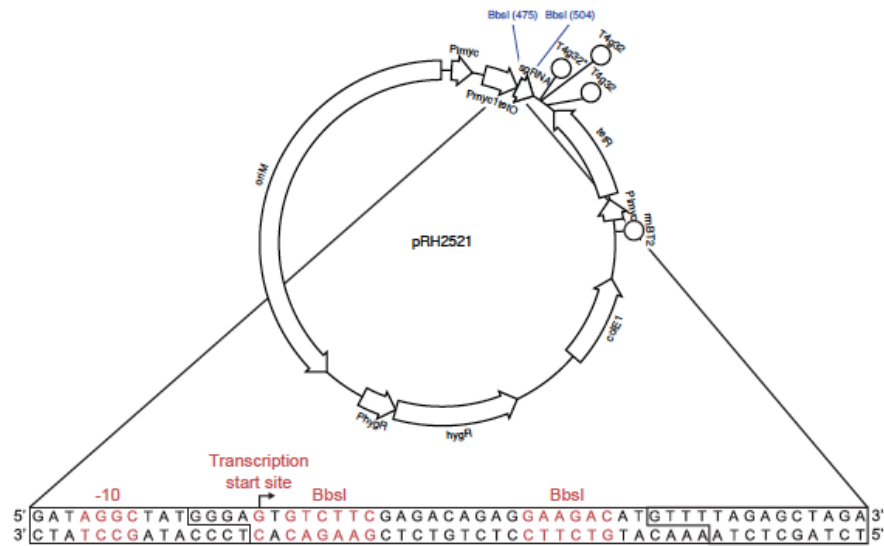

**1** Digest pRH2521 with BbsI and dephosphorylate

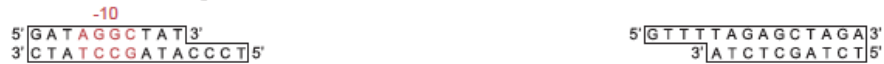

**2** Design oligos to generate sgRNA with 20 nt sequence complementary to the non-template strand of the target gene

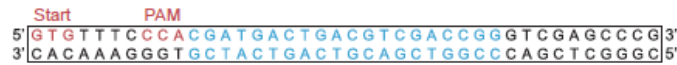

**3** Anneal oligos for Msm\_sigH+11 to create dsDNA inserts

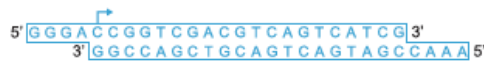

**4** Phosphorylate dsDNA inserts

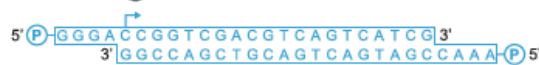

**5** Ligate phosphorylated dsDNA inserts into pRH2521

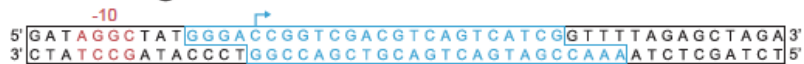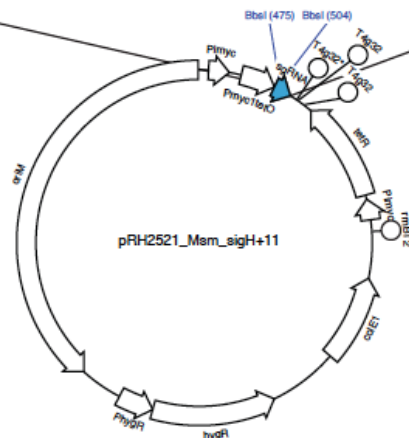

**6** Transform pRH2521-Msm\_sigH+11 into *M. smegmatis* that already contains pRH2502-dCas9

**Figure S4. a. Transcription start sites identified by 5' RACE. b. Locations targeted by sgRNAs in 4 essential genes of *M. tuberculosis*.** The locations in each gene targeted by CRISPRi are indicated by the vertical purple line. Numbering is the position of the first nt of the targeted sequence relative to the initiation codon.

a

|                       |                                                                                    |          |            |
|-----------------------|------------------------------------------------------------------------------------|----------|------------|
| Rv1484- <i>inhA</i>   | GATGAGCC <u>GGATTC</u> AGCAGGGGGCGCTGCAAT <u>TTTATC</u> CCAGCGAAG <u>C</u> GGGTCCG | -127/ATG | This study |
| Rv2763c- <i>dfrA</i>  | CGCGGTATGAGGCGCGCCGACGACAATGAAGTCGGGCTCGGACAG <u>C</u> CTTCAAGC                    | -36/ATG  | This study |
| Rv2145c- <i>wag31</i> | TGGCGCGCACGATTTCAAATCTAAGGATTGTGATTTATTTGGTCTT <u>A</u> GAGTTTGA                   | -147/ATG | This study |
| Rv2150c- <i>ftsZ</i>  | ACTTGACATAACTCTAAGCCTATGGTTGAGGTTGAGAGTTTGCCAGCA <u>G</u> ACACA                    | -43/ATG  | (3)        |

b

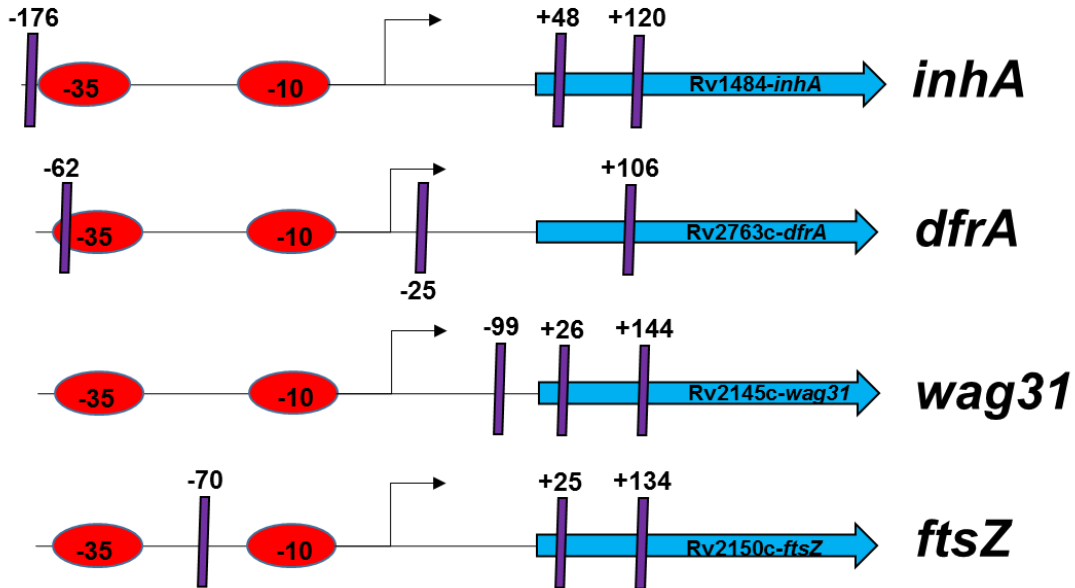

**Figure S5. Determination of minimum inhibitory concentration of (a) isoniazid (INH) and (b) methotrexate (MTX) in *M. tuberculosis* strains expressing *dcas9* and either gene-specific sgRNAs or the sgRNA vector control. The Microplate Alamar Blue Assay (MABA) was performed as described in the materials and methods section.**

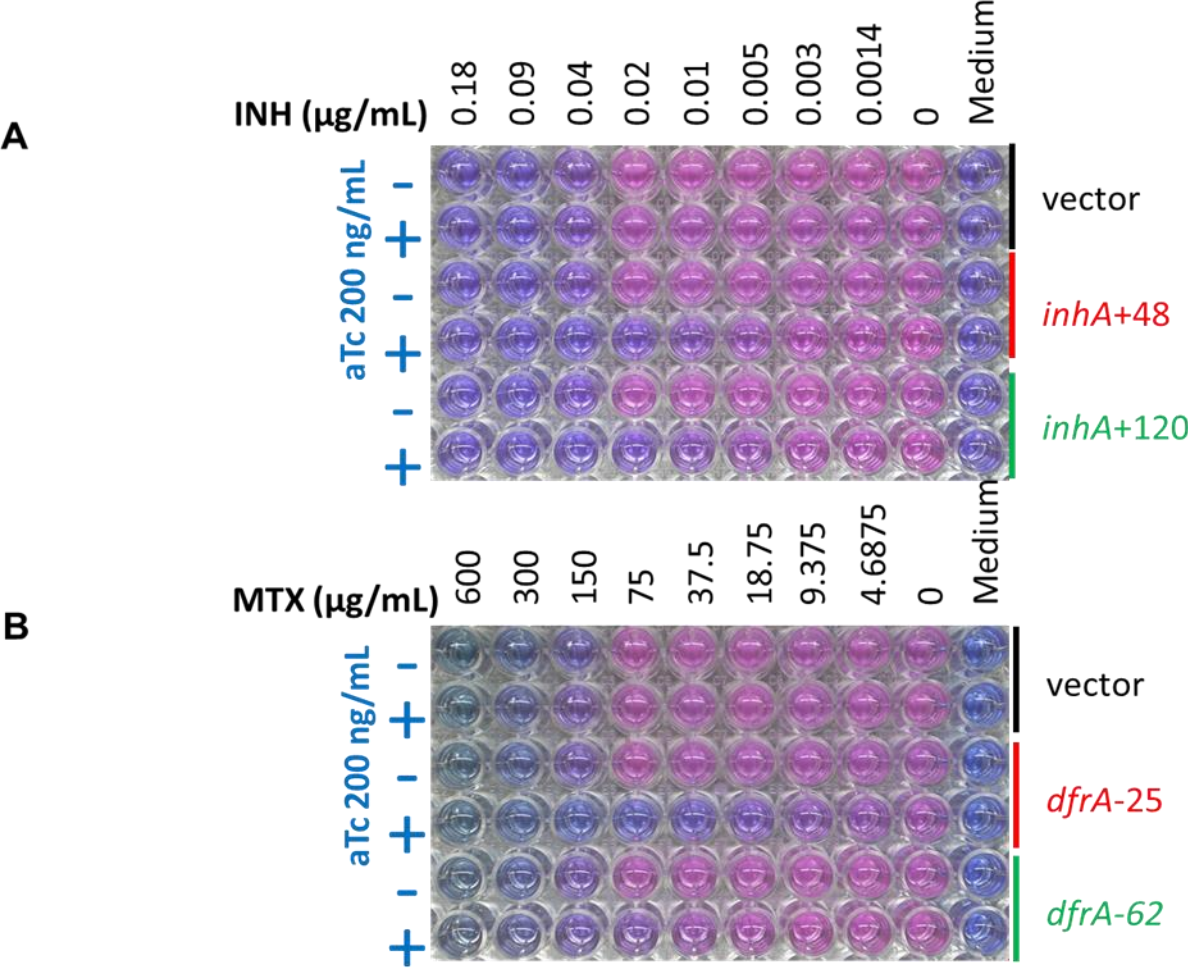

**Figure S6. Effect of CRISPRi on off target genes that differ from the specific target sequence including the PAM by 2, 4 or 5nt.** Expression of all genes containing a sequence that diverged by 2 or 4 nt, regardless of the presence of an intact PAM, was measured. Of the genes containing a sequence that differed by 5 nt, expression was measured only for those that had an intact PAM sequence. **Panel a**, alignment of target gene sequences and the sequences for the off-target genes for which expression following *dcas9* and sgRNA induction was measured. Nucleotides that differ are shown in red. The PAM sequence is underlined. **Panels b-j**, expression of the off-target genes following induction of *dcas9* and the sgRNA indicated above each panel. No significant differences were observed at 24 or 48h for any of the 9 genes tested. **Table 1** below shows the number of mismatches for each off-target site compared the site targeted by the sgRNA indicated.

**a**

***sigH-222***                    5' - CCCG**C**TGGCGAACAC**CGGT**TGAT**T**-3'  
Rv3618-ATG-812nt- CCCG**T**TGGCGAACAC**CGT****GGA****A**G-341nt-TGA

***inhA+48***                    5' - CCG**A**CTCGTCGAT**C**CGTTTC**A**C-3'  
Rv0402c -GTG-1396nt- ACC**A**CTCGTCGAT**C**CGTTTC**A**G-1451nt-TAG

***inhA+120***                    5' - CCGG**C**TGCGGC**T**GAT**T****C**A**G**CGCA-3'  
Rv0352                            - ACGG**C**TGCGGC**C**GAT**G****C**GCGCA-594nt-ATG

***dfrA-25***                    5' - CCG**G**AAT**C****A**GGAGT**G****A**CGCGT**G**-3'  
Rv1778c -ATG-340nt- CAG**G**AAT**C****T****A**C**G**AGT**G****G**CGCGT**G**-81nt-TAG

***dfrA-25***                    5' - CCG**G**AAT**C**AAG**G****A**GT**G****A**CGCG**T****G**-3'  
Rv2885c-ATG-145nt - CCG**A****C**AT**C**AAG**G****C**GT**G****G**C**G****C**G-1206nt-TGA

***Wag31+144***                    5' - CCG**A**T**C**T**G**CGTCAG**A**GG**A**T**C**A**C**-3'  
Rv2880c-ATG-157nt - CCG**A**T**C****C**GCGTCAG**A**T**G****A****C****C**G**A**C-642nt-TGA

***ftsZ+25***                    5' - CCG**T**CAT**C**AAGG**T****C**G**T**GGG**T****A**T**C**-3'  
Rv2277c-ATG-781nt - CCG**G**CAT**G**AAGG**T****C****A**TGGG**T****T**T**C**-96nt-TAA

***ftsZ+134***                    5' - CCAG**G****C**G**T**T**G**T**T**GAT**G**A**G**CGAT**G**-3'  
Rv3307-GTG-389nt - CCAG**C****C**G**T****G****C**T**G**A**T****C**A**G**CGAT**C**-389nt-TAA

***ftsZ+134***                    5' - CC**A**GG**C****G**T**T**G**T**T**G**A**T**G**A**GCGAT**G**-3'  
Rv0186-ATG-134nt - CC**C**GG**C****C**T**T**G**T**T**G**A**T**G**A**GCGAT**G**-1913nt-TGA

Figure S6. (Continued)

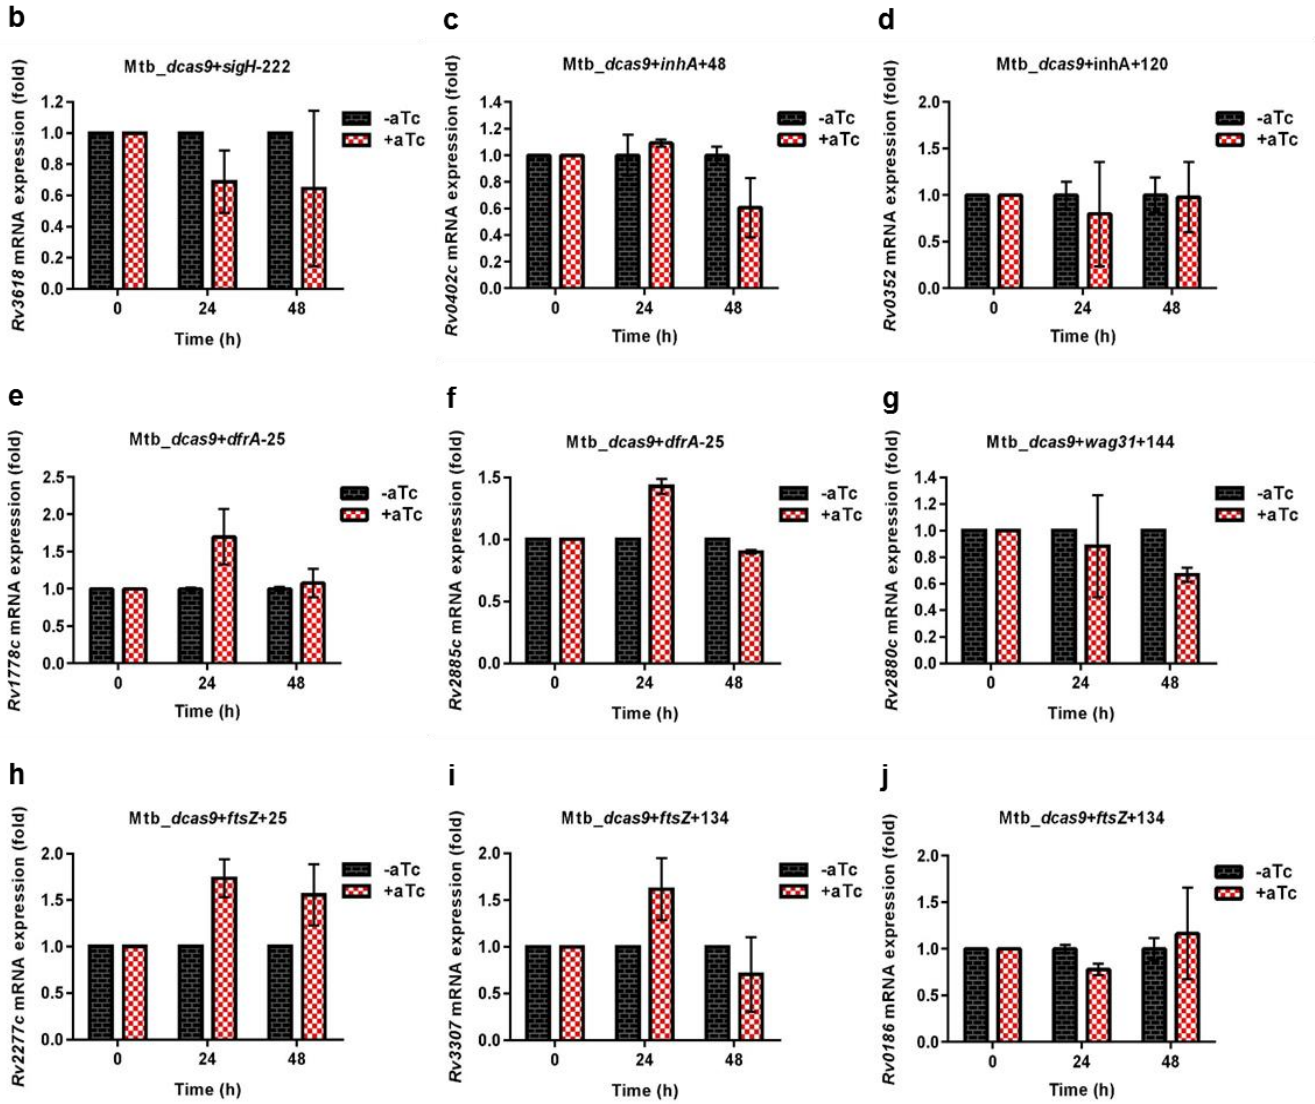



**Figure S7. Polar effects on *pknB* (Rv0014c) of CRISPRi targeting *pknA* (Rv0015c)** a. Position of target sequences, shown by purple vertical lines. Numbering refers to the first nucleotide in the target sequence relative to annotated start of coding sequence. Circled sgRNAs are those for which expression data are shown. **b,c.** Expression of *dcas9* with and without induction of *dcas9* and the sgRNA indicated. **d,e.** Expression of *pknA* without induction of *dcas9* and the *pknA*-targeting sgRNA indicated. **f,g.** Expression of *pknB* without induction of *dcas9* and the *pknA*-targeting sgRNA indicated. **h,i.** Growth curves of culture with and without induction of *dcas9* and the sgRNA indicated.

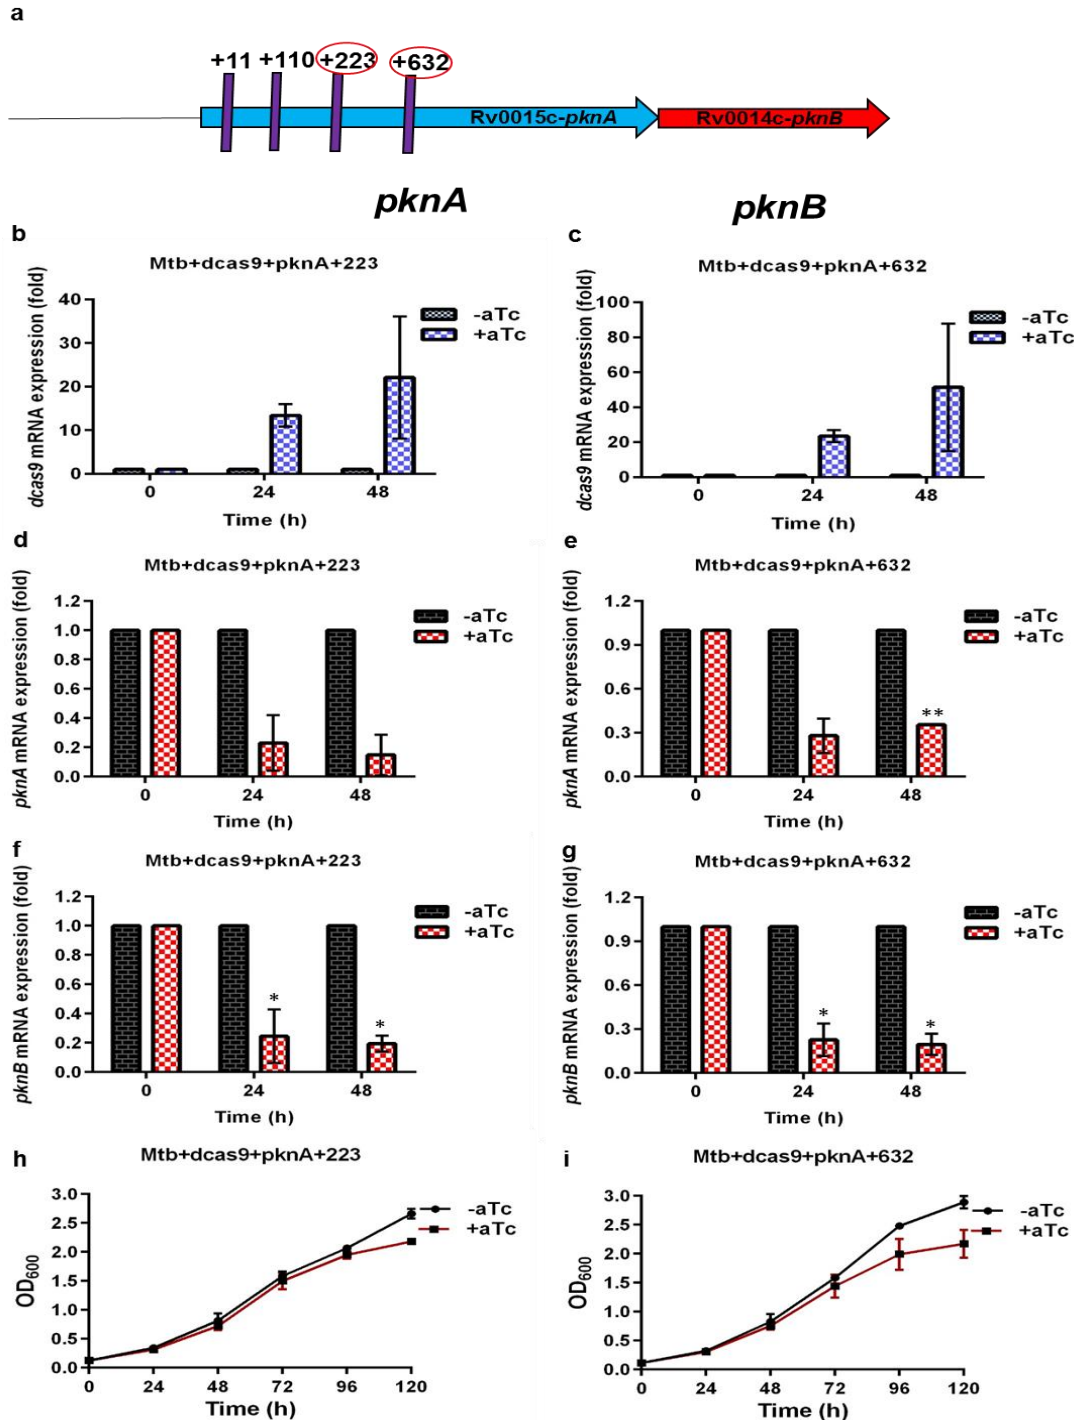



**Supplementary Table 1: Potential off-target sequences for sgRNAs.**

| S.N. | Gene         | Position of sgRNA relative to translation start codon of target gene | Number of mismatches/gene with mismatch |        |   |         |                      |
|------|--------------|----------------------------------------------------------------------|-----------------------------------------|--------|---|---------|----------------------|
|      |              |                                                                      | 1                                       | 2      | 3 | 4       | 5                    |
| 1    | <i>sigH</i>  | -222                                                                 | 0                                       | 0      | 0 | 0       | Rv2226, Rv3618       |
| 2    |              | -11                                                                  | 0                                       | 0      | 0 | 0       | 0                    |
| 3    |              | +9                                                                   | 0                                       | 0      | 0 | 0       | 0                    |
| 4    | <i>pknB</i>  | +8                                                                   | 0                                       | 0      | 0 | 0       | Rv0691c              |
| 5    |              | +51                                                                  | 0                                       | 0      | 0 | 0       | Rv1904               |
| 6    |              | +143                                                                 | 0                                       | 0      | 0 | 0       | Rv2115c              |
| 7    | <i>pknA</i>  | +223                                                                 | 0                                       | 0      | 0 | 0       | 0                    |
| 8    |              | +632                                                                 | 0                                       | 0      | 0 | 0       | Rv0753c              |
| 9    | <i>inhA</i>  | +48                                                                  | 0                                       | 0      | 0 | Rv0402c | Rv0680c              |
| 10   |              | +120                                                                 | 0                                       | 0      | 0 | Rv0352  | Rv0050,0130c,0676c   |
| 11   | <i>dfrA</i>  | -62                                                                  | 0                                       | 0      | 0 | 0       | Rv3031               |
| 12   |              | -25                                                                  | 0                                       | 0      | 0 | Rv1778c | Rv2885c              |
| 13   | <i>wag31</i> | +26                                                                  | 0                                       | 0      | 0 | 0       | 0                    |
| 14   |              | +144                                                                 | 0                                       | 0      | 0 | Rv2880c | 0                    |
| 15   | <i>ftsZ</i>  | +25                                                                  | 0                                       | 0      | 0 | Rv2277c | 0                    |
| 16   |              | +134                                                                 | 0                                       | Rv0186 | 0 | 0       | Rv1050,Rv0934,Rv3307 |

Expression of off-target genes highlighted in red was measured in strains with and without induction of *dcas9* and the sgRNA that contains a similar sequence.

**Supplementary Table 2: List of oligonucleotides and primers used in this study.**

| <b>oligonucleotides used for sgRNA</b> |                                               |                                 |
|----------------------------------------|-----------------------------------------------|---------------------------------|
| <b>sgRNA</b>                           | <b>Forward Primer</b>                         | <b>Reverse Primer</b>           |
| Msm_sigH+11                            | GGGACCGGTTCGACGTCAGTCATCG                     | AAACCGATGACTGACGTCGACCGG        |
| Msm_pknB+8                             | GGGAGTCGGAAAGGTGCTGAGGCG                      | AAACCGCCTCAGCACCTTTCCGAC        |
| Mtb_pknB+8                             | GGGAGTCGGACAGGTGGGAAGGGG                      | AAACCCCTTCCCACCTGTCCGAC         |
| Mtb_pknB+51                            | GGGACGGACATGCCCCAAATCCA                       | AAACTGGATTTGGGGGCATGTCCG        |
| Mtb_pknB+143                           | GGGAAAGGTAAAAACTGGGATCGC                      | AAACGCGATCCCAGTTTTTTACCTT       |
| Mtb_inhA+48                            | GGGAGTGAAACGCGATCGACGAGT                      | AAACACTCGTCGATCGCGTTTTAC        |
| Mtb_inhA+120                           | GGGATGCGCTGAATCAGCCGACG                       | AAACGCTGCGGCTGATTCAGCGCA        |
| Mtb_dfrA-62                            | GGGAGGCGCGCTCATACCGCGAC                       | AAACGTCGCGGTATGAGGCGCGCC        |
| Mtb_dfrA-25                            | GGGACACGCGTCACTCCTTGATTC                      | AAACGAATCAAGGAGTGACGCGTG        |
| Mtb_gyrA-110                           | GGGAGCGTCGACGTCCTCGCCCAT                      | AAACGATGGGCGAGGACGTGACG         |
| Mtb_gyrA-25                            | GGGACCTCGTTTTGCAATCGAACGC                     | AAACGCGTTTCGATTGCAAACGAGG       |
| Mtb_wag31+26                           | GGGACTTACTGAACGCCACATTGG                      | AAACCAATGTGGCGTTCAGTAAGC        |
| Mtb_wag31+144                          | GGGAGTTGATCCTCTGACGCAGAT                      | AAACATCTGCGTCAGAGGATCAAC        |
| Mtb_ftsZ+25                            | GGGAGATACCCACGACCTTGATGA                      | AAACTCATCAAGGTCGTGGGTATC        |
| Mtb_ftsZ+134                           | GGGACATCGCTCATCAACAACGCC                      | AAACGGCGTTGTTGATGAGCGATG        |
| Mtb_pknA+223                           | GGGATTTCGCCGTAGTCGTGCACGC                     | AAACGCGTGCACGACTACGGCGAA        |
| Mtb_pknA+632                           | GGGATCCCAGTGAATAGACGTCGC                      | AAACGCGACGTCTATTCACTGGGA        |
| <b>Gene</b>                            | <b>Primers used for qRT PCR</b>               |                                 |
| dcas9                                  | AAGAAGTACAGCATCGGCCTGG                        | TTCTTGCGCCGCGTGTATCG            |
| Msm_sigH                               | GAGACAGATGCCGAGCTCAC                          | AGGCCTTACCATCGTTTTCC            |
| Msm_pknB                               | CATGGAGTACGTCGACGGTGTGAC                      | CTTGACATCGCGGTGGATGATG          |
| Msm_sigA                               | TGCCGATCTGCTTGAGGTAGG                         | TTCGTGTGGGACGAGGAAGAG           |
| Msm_5'sigA                             | GACCTTGAGGTGACCGACG                           | CTTCTTCTCGTCTCTGACTG            |
| Msm_3'sigA                             | TCGACGAGATCGGCCAGG                            | TAGTCCAGGTAGTCGCGCAG            |
| Mtb_pknB                               | ACATTGTCCACACCGAAGGG                          | GCTGATCATGATGTTTCGCCG           |
| Mtb_inhA                               | ATCCACATCTCGGCGTATTC                          | ACGAACCTGTTGACCGACTC            |
| Mtb_dfrA                               | AGATCACCATGGGGCACAC                           | GCCATAAAGTCAGCTTGGCG            |
| Mtb_gyrA                               | TGACATCGAGCAGGAGATGC                          | AAGCCGGAATCGAACATTGC            |
| Mtb_wag31                              | TAAGCCGCCTATCGGCAAAC                          | AGCTCGTTGATCCTCTGACG            |
| Mtb_ftsZ                               | CAAGGACGAGATCGAAGAGC                          | GGAATCACGATGAGGGTGTGTC          |
| Mtb_pknA                               | AAAGCCAGATGAACGGGGAG                          | TCGAGCATGTCCAGTGCG              |
| Mtb_5'sigA                             | GAGGACCTCGACCTTGACG                           | GGCCGCCTCAGCTTCG                |
| Mtb_3'sigA                             | ACCCACCGAAAAGGACAAGG                          | CTGTTTGAGGTAGGCGCGAA            |
| Rv0402c                                | GTCCTCATCTGGCAGCACAT                          | GGCCCCGATTTCTTCTTGGA            |
| Rv0352                                 | AGACCGAGTTGGATTTCTGTG                         | TGCAAGTGGGACACACCTTT            |
| Rv1778c                                | ATCCTCTTTGAAGCCGCCG                           | GCCACTCGTAGATTCTTGGT            |
| Rv0186                                 | GGATCCTGCGGTTCGATGTTT                         | TTTTGCAGCAGCAGGATTCC            |
| Rv2880c                                | AATCGGTGCTGATGCGCTA                           | CCGTGATAGGTTGCGAGTC             |
| Rv2277c                                | GTGAATGCCGAGTTGTGGGA                          | ACCGCATCGAGTCCGATTTT            |
| Rv3307                                 | GAGATCCGGATGTTGCAGA                           | GGATACGCCAGTACCTCAG             |
| Rv3618                                 | AGTCGTCTCGGGAATTCGT                           | CAGTAGCAACGTTCCGAAGC            |
| Rv2885c                                | CAAAGACCAGGTGTGTGTCA                          | CAGCTCTGCCAGTTCCAATA            |
| <b>Primers used for 5' RACE</b>        |                                               |                                 |
| Adapter                                | GCUGAUGGCGAUGAAUGAACACUGCGUUUGCUGGCUUUGAUGAAA |                                 |
| Outer forward                          | GCTGATGGCGATGAATGAACACTG                      |                                 |
| Inner forward                          | CGCGGATCCGAACACTGCGTTTTGCTGGCTTTGATG          |                                 |
| <b>Rv No.</b>                          | <b>GSP1 (Outer PCR Reverse)</b>               | <b>GSP2 (Inner PCR Reverse)</b> |
| Rv1484                                 | GATGATTCCGCTAACCCAGAAATCCG                    | GCCGCCGTCGACCGGGATGA            |
| Rv2763c                                | ATGTGCGCCGGCCCATCACGA                         | TGTCGCTTGAGCCCAGATCAG           |
| Rv2145c                                | CCGATAGGCGGCTTACTGAACGCC                      | ATAAGGACCAATTTCAAACCTAAG        |

## References

1. Klotzsche, M., Ehrh, S. and Schnappinger, D. (2009) Improved tetracycline repressors for gene silencing in mycobacteria. *Nucleic Acids Res*, **37**, 1778-1788.
2. Ehrh, S., Guo, X.V., Hickey, C.M., Ryou, M., Monteleone, M., Riley, L.W. and Schnappinger, D. (2005) Controlling gene expression in mycobacteria with anhydrotetracycline and Tet repressor. *Nucleic Acids Res*, **33**, e21.
3. Kiran, M., Chauhan, A., Dziedzic, R., Maloney, E., Mukherji, S.K., Madiraju, M. and Rajagopalan, M. (2009) *Mycobacterium tuberculosis ftsH* expression in response to stress and viability. *Tuberculosis*, **89**, S70-S73.
